# Supplementary material for: A DFT study of boron nitride-confined nickel single atoms for the oxidation of methane to methanol
Source: Royal Society of Chemistry journal article supplement (doi:10.1039/d2cp03671a), 2022-01-01
Supplement: d2cp03671a1.pdf [file d2cp03671a1.pdf]

# A DFT Study of Boron Nitride-confined Nickel Single Atoms for the Oxidation of Methane to Methanol

Sanmei Wang,<sup>a</sup> Bo Yu,<sup>b\*</sup> Liangbing Wang<sup>a\*</sup>

<sup>a</sup> *State Key Laboratory for Powder Metallurgy, School of Materials Science and Engineering, Central South University, Changsha, Hunan 410083, P. R. China*

<sup>b</sup> *Ningbo Fengcheng Advanced Energy Materials Research Institute, Fenghua District, Ningbo, Zhejiang, 315500, China*

\*To whom correspondence should be addressed.

E-mail: [yu.bo@fcnano.cn](mailto:yu.bo@fcnano.cn); [wanglb@csu.edu.cn](mailto:wanglb@csu.edu.cn)

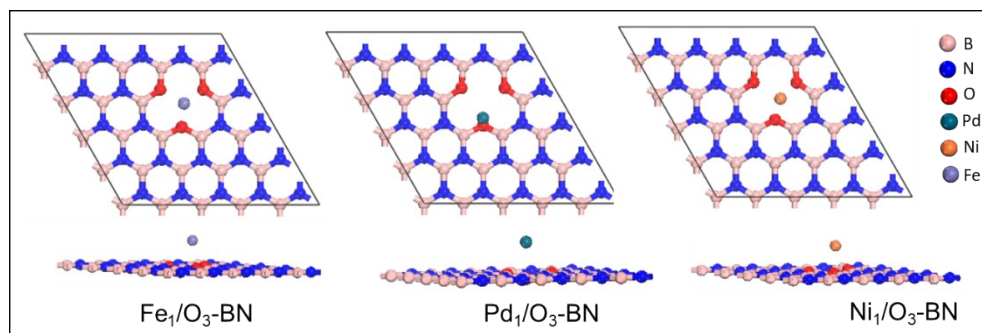

**Fig. S1** Optimized structures of  $M_1/O_3$ -BN ( $M=Fe, Pd, Ni$ ). The purple, orange, cyan, dark blue, bright red, and pink spheres represented Fe, Ni, Pd, N, O, and B atoms, respectively.

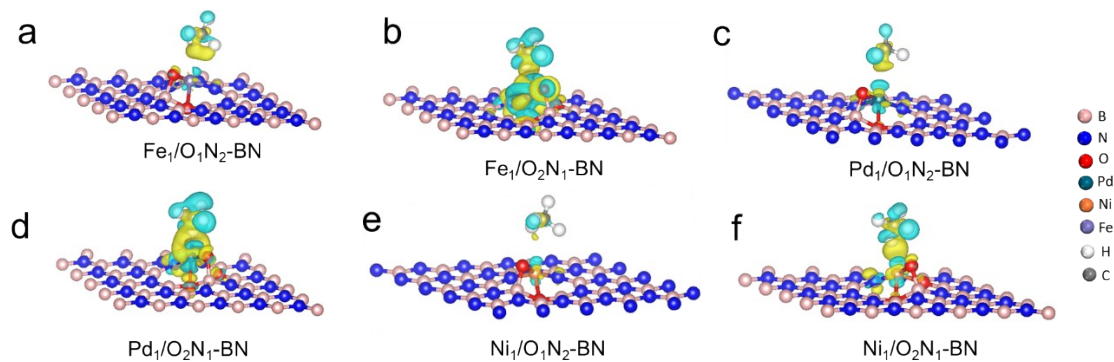

**Fig. S2** Charge density difference for CH<sub>4</sub> molecule adsorbed on (a) Fe<sub>1</sub>/O<sub>1</sub>N<sub>2</sub>-BN, (b) Fe<sub>1</sub>/O<sub>2</sub>N<sub>1</sub>-BN, (c) Pd<sub>1</sub>/O<sub>1</sub>N<sub>2</sub>-BN, (d) Pd<sub>1</sub>/O<sub>2</sub>N<sub>1</sub>-BN, (e) Ni<sub>1</sub>/O<sub>1</sub>N<sub>2</sub>-BN, and (f) Ni<sub>1</sub>/O<sub>2</sub>N<sub>1</sub>-BN. The isosurface value was 0.0015 e/Å<sup>3</sup>. The gray, white, purple, orange, cyan, dark blue, bright red, and pink spheres represented C, H, Fe, Ni, Pd, N, O, and B atoms, respectively.

**Table S1** The charge-transfer values from CH<sub>4</sub> to the catalyst. The integrated crystal orbital Hamilton population (ICOHP) between the metal atoms and the C atom of adsorbed CH<sub>4</sub>.

|                                                    | charge-transfer values (e) | ICOHP (eV) |
|----------------------------------------------------|----------------------------|------------|
| Fe <sub>1</sub> /O <sub>1</sub> N <sub>2</sub> -BN | 0.01                       | -2.46      |
| Fe <sub>1</sub> /O <sub>2</sub> N <sub>1</sub> -BN | 0.03                       | -2.71      |
| Pd <sub>1</sub> /O <sub>1</sub> N <sub>2</sub> -BN | 0.01                       | -3.03      |
| Pd <sub>1</sub> /O <sub>2</sub> N <sub>1</sub> -BN | 0.11                       | -3.13      |
| Ni <sub>1</sub> /O <sub>1</sub> N <sub>2</sub> -BN | 0.003                      | -2.50      |
| Ni <sub>1</sub> /O <sub>2</sub> N <sub>1</sub> -BN | 0.03                       | -2.68      |

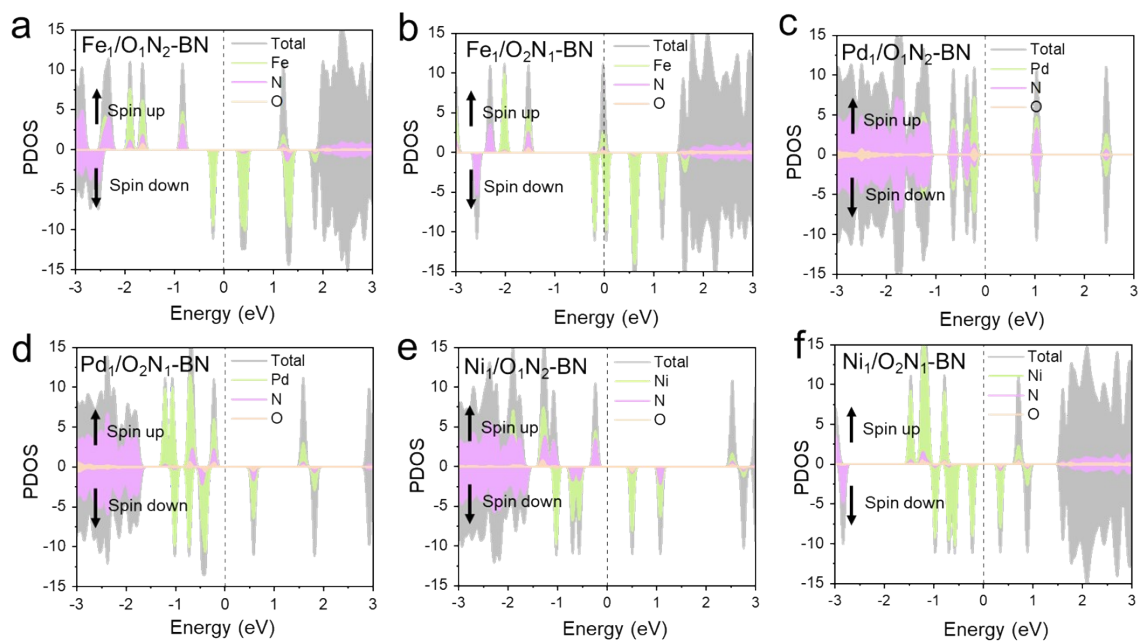

**Fig. S3** Density of states (DOS) of (a)  $\text{Fe}_1/\text{O}_1\text{N}_2\text{-BN}$ , (b)  $\text{Fe}_1/\text{O}_2\text{N}_1\text{-BN}$ , (c)  $\text{Pd}_1/\text{O}_1\text{N}_2\text{-BN}$ , (d)  $\text{Pd}_1/\text{O}_2\text{N}_1\text{-BN}$ , (e)  $\text{Ni}_1/\text{O}_1\text{N}_2\text{-BN}$ , and (f)  $\text{Ni}_1/\text{O}_2\text{N}_1\text{-BN}$  catalysts. The dotted black lines represented the Fermi energy level.

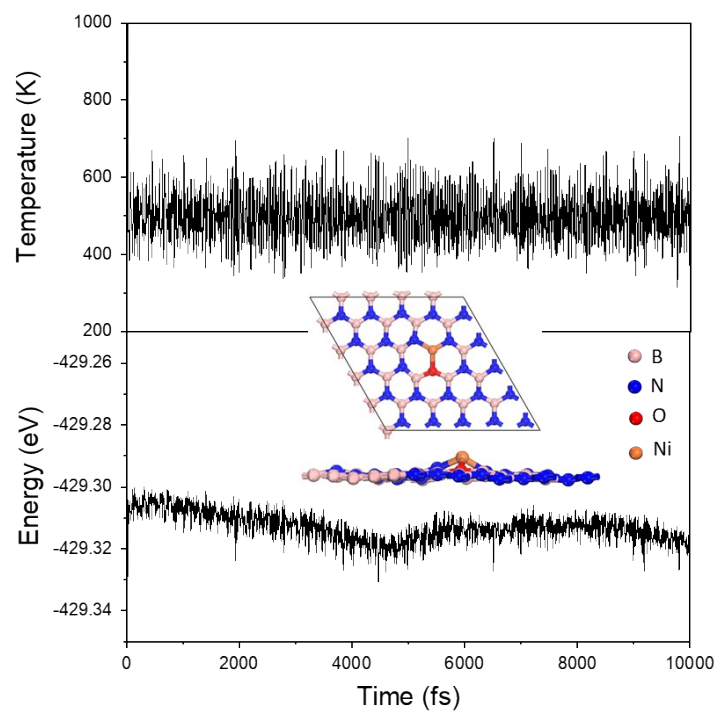

**Fig. S4** Variations of energy and temperature against the time for the AIMD simulations of  $\text{Ni}_1/\text{O}_1\text{N}_2\text{-BN}$ . Insert pictures were top and side views of  $\text{Ni}_1/\text{O}_1\text{N}_2\text{-BN}$  after running 10 ps with a time-step of 1 fs at 500 K.
